# Supplementary material
Source: PubMed Central journal article supplement (PMC8568830)

rs28749114-A-G **HLA-A**

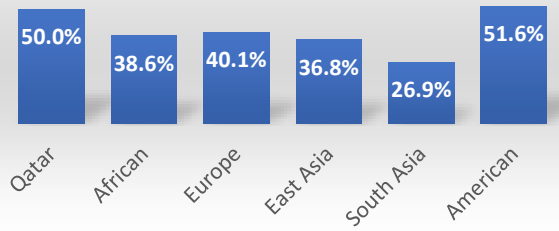

rs3916500-A-T **HLA-A**

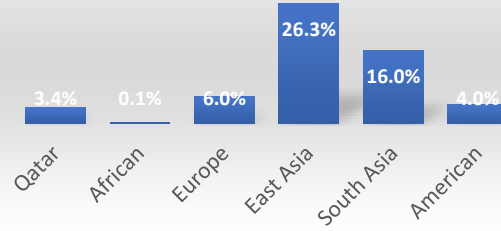

rs9260151-C-T **HLA-A**

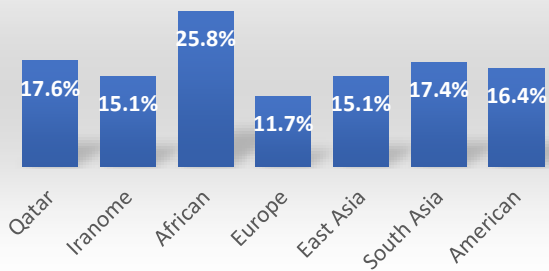

rs10484554-C-T **HLA-B**

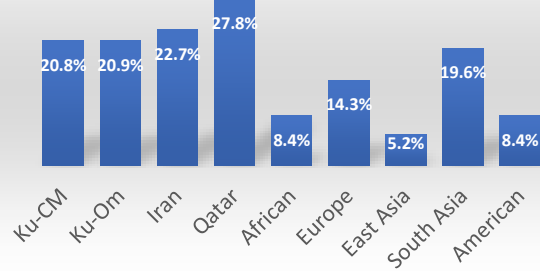

rs1065386-G-C **HLA-B**

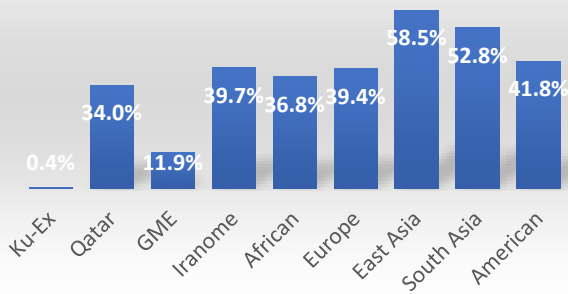

rs116576188-A-C **HLA-B**

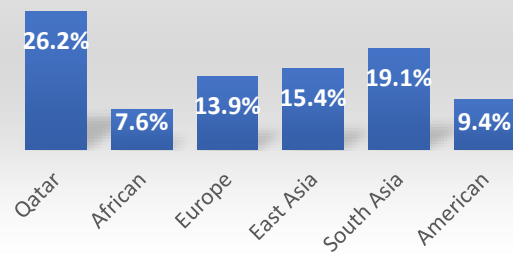

rs12191877-C-T **HLA-B**

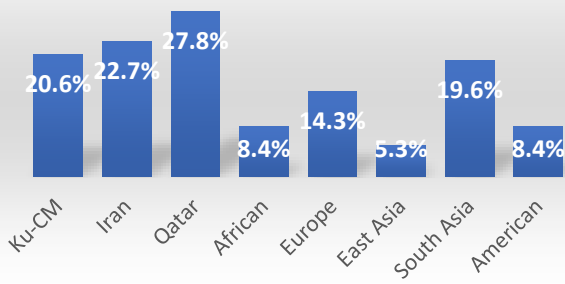

rs12199223-T-A **HLA-B**

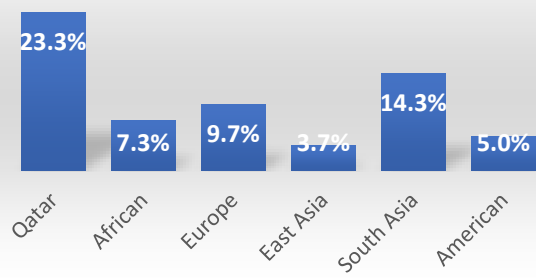

rs13191343-C-T **HLA-B**

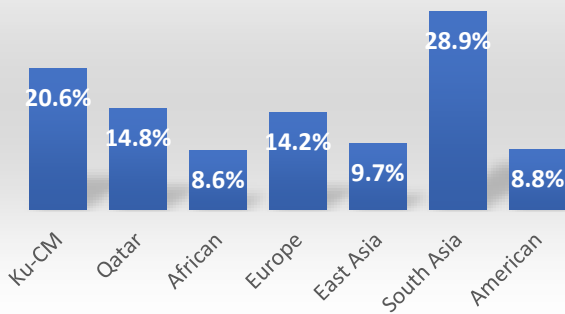

rs1634738-G-A **HLA-B**

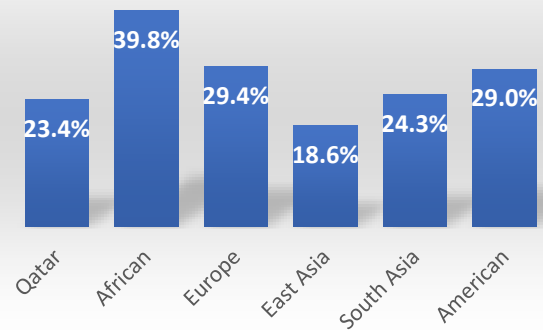

rs2523608-G-A **HLA-B**

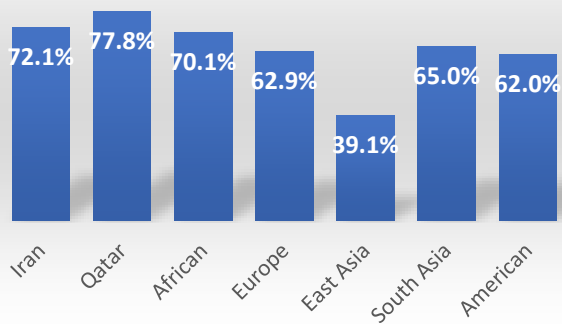

rs2596492-A-G **HLA-B**

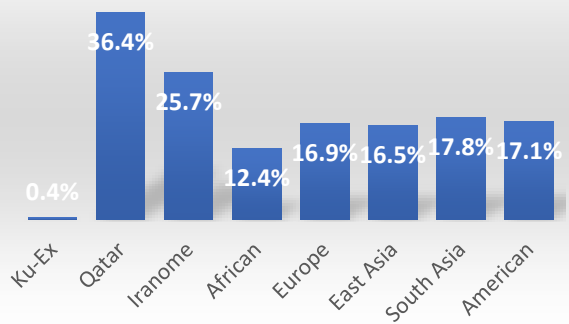

rs2853946-A-T **HLA-B**

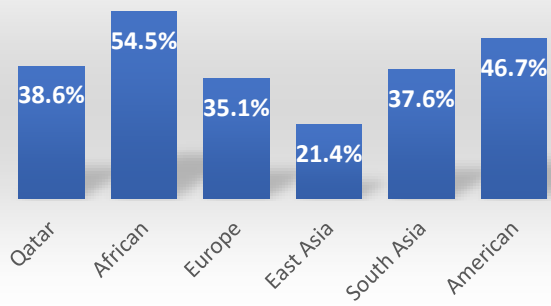

rs34429926-G-A **HLA-B**

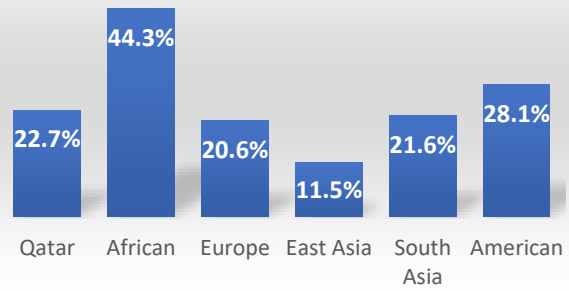

rs4406273-G-A **HLA-B**

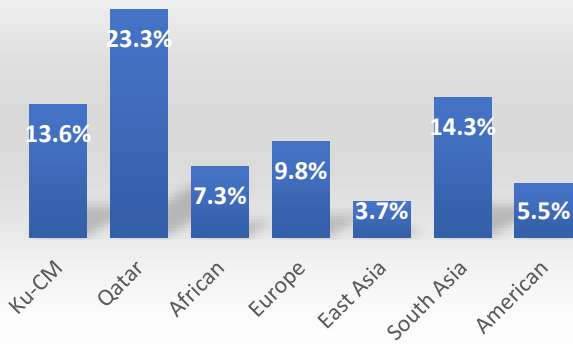

rs9264942-T-C **HLA-B**

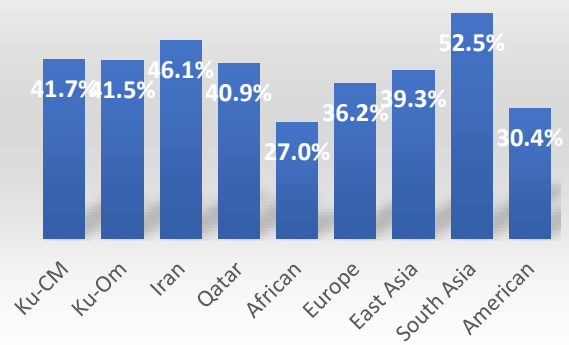

rs9265503-C-T **HLA-B**

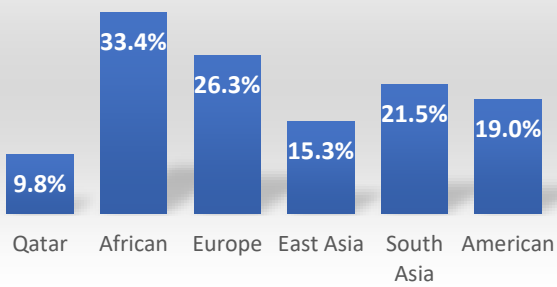

rs9357121-T-G **HLA-B**

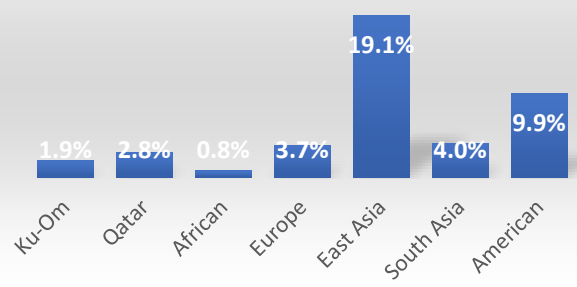

rs2013717-T-G **ERAP1**

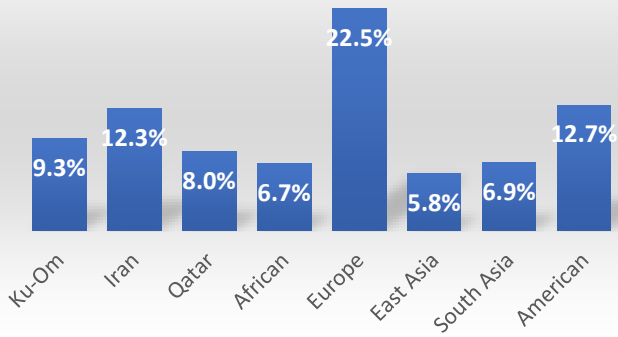

rs27033-T-A **ERAP1**

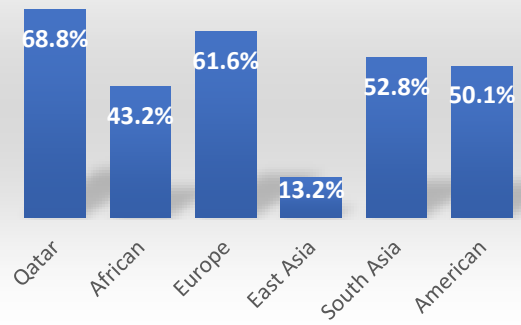

rs42398-C-T **ERAP1**

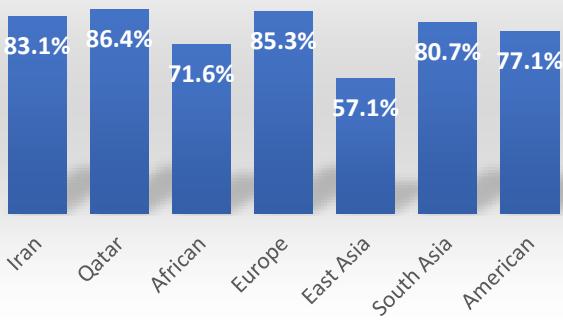

rs469735-T-C **ERAP1**

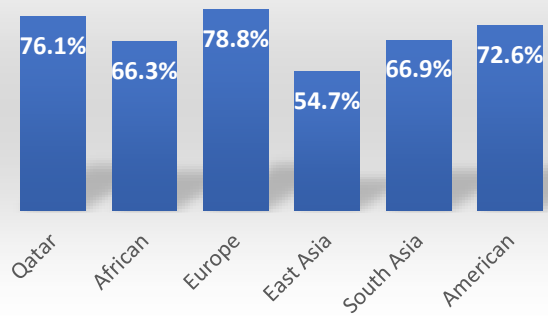

rs1363907-G-A **ERAP2**

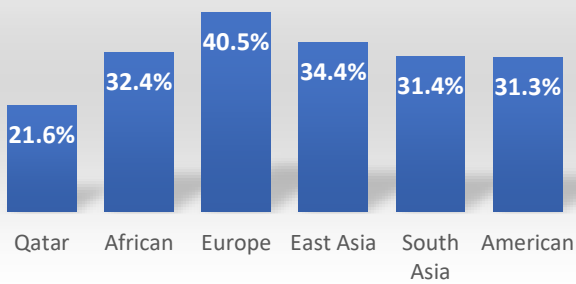

rs4869313-T-G **ERAP2**

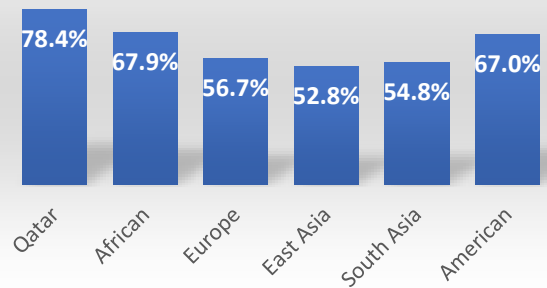

Supplement: mmc1.pdf [file mmc1.pdf]
