# Supplementary material
Source: PubMed Central journal article supplement (PMC8568830)

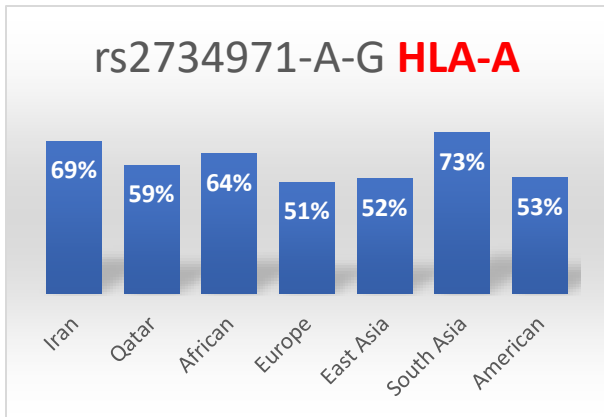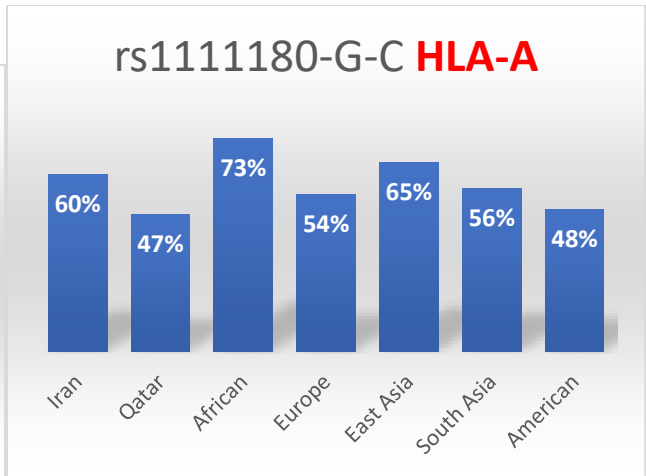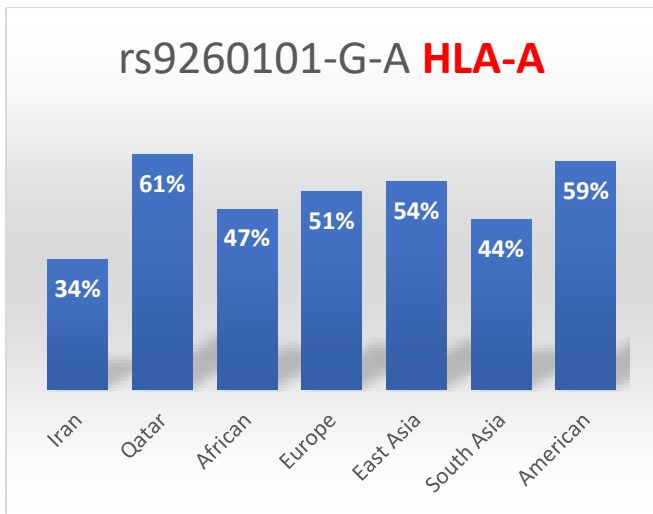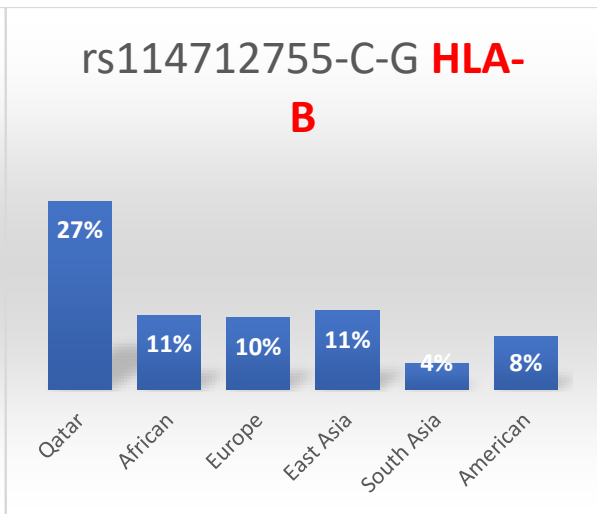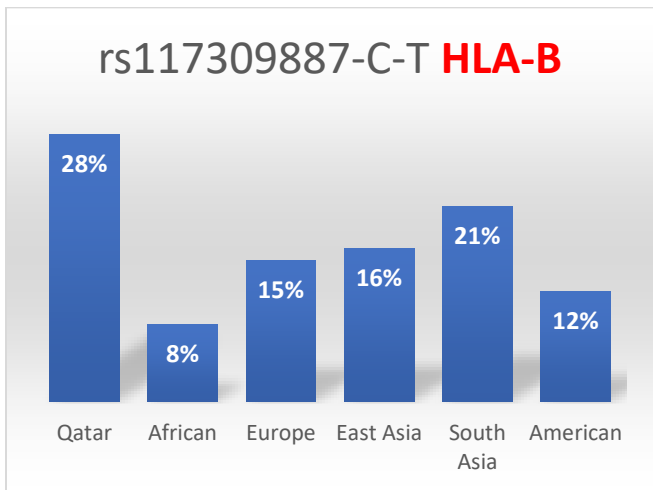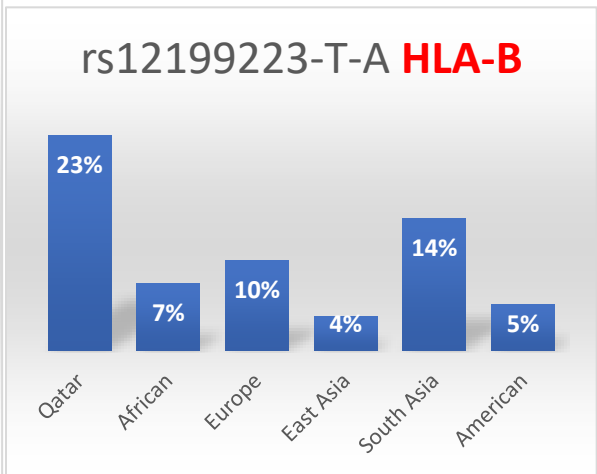

rs2394987-C-A **HLA-B**

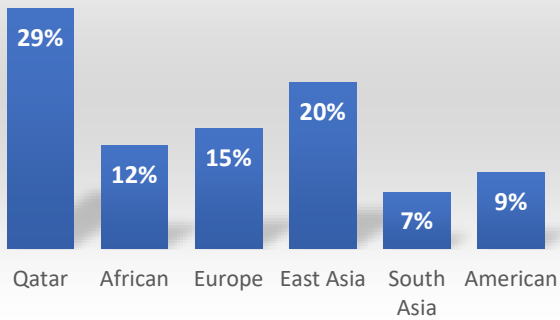

rs2523663-G-T **HLA-B**

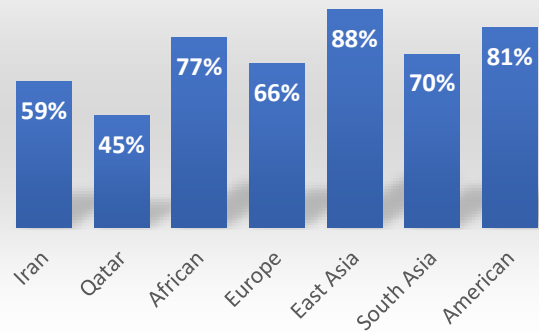

rs3095257-G-T **HLA-B**

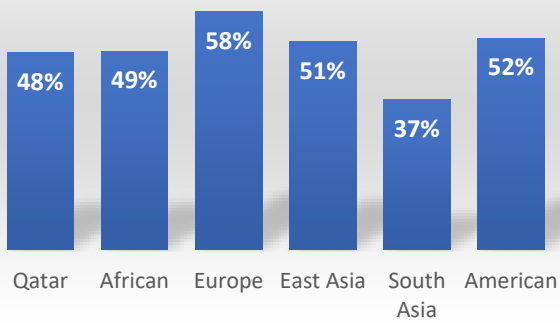

rs9264218-A-T **HLA-B**

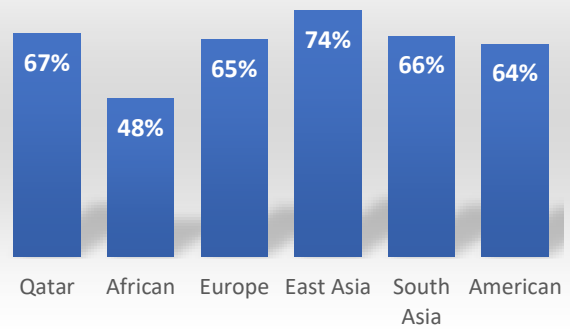

rs9264255-T-A **HLA-B**

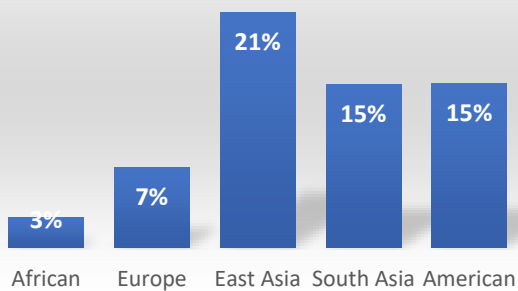

rs27039-G-A **ERAP1**

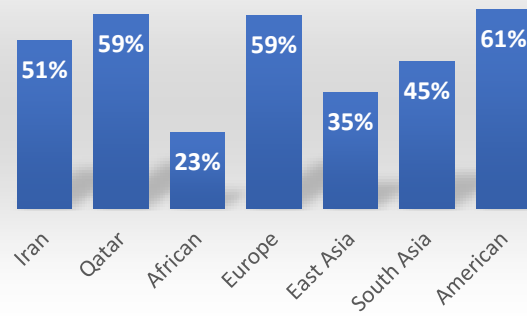

rs27043-G-A **ERAP1**

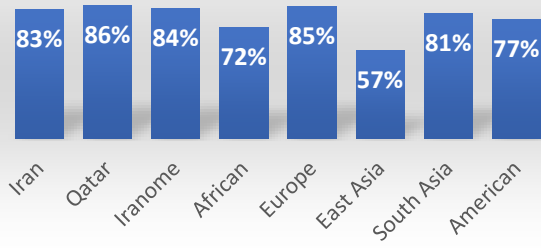

rs27433-T-G **ERAP1**

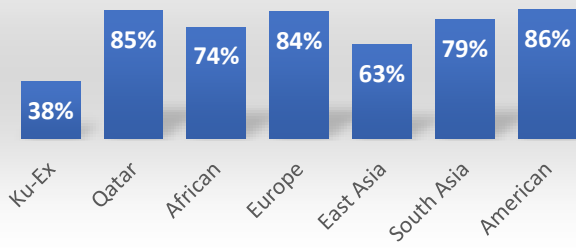

rs3797814-G-A **ERAP1**

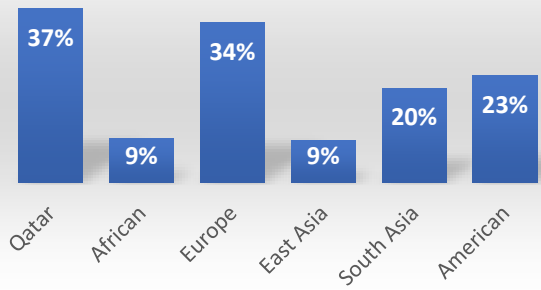

rs42398-C-T **ERAP1**

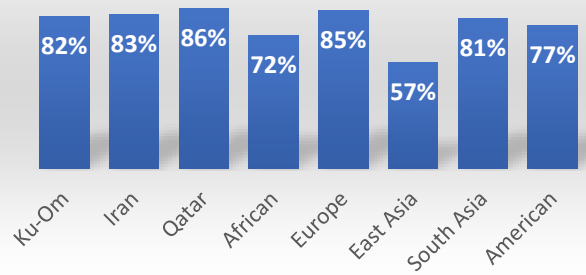

rs7356594-G-T **ERAP1**

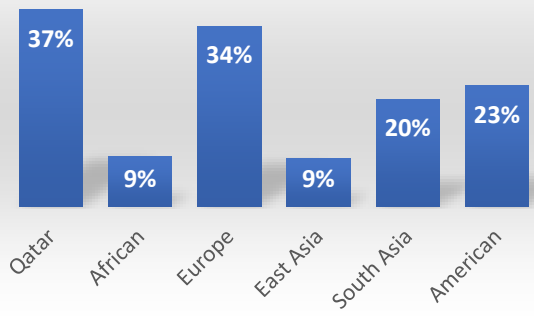

rs112171234 - **ACE2**

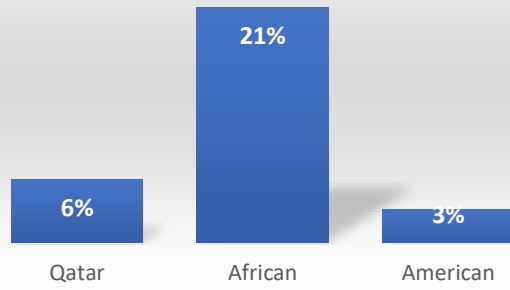

rs4646127 - **ACE2**

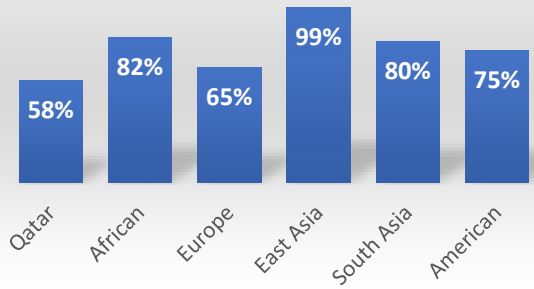

rs5936029 - **ACE2**

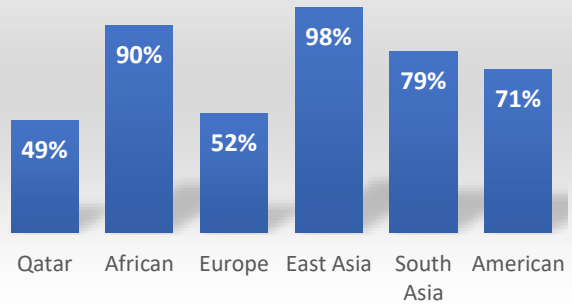

rs6632704 - **ACE2**

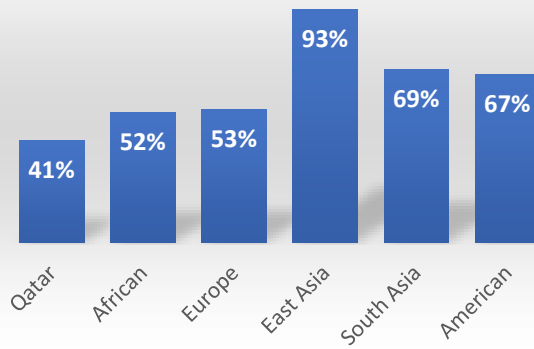

rs1996225 - **ACE2**

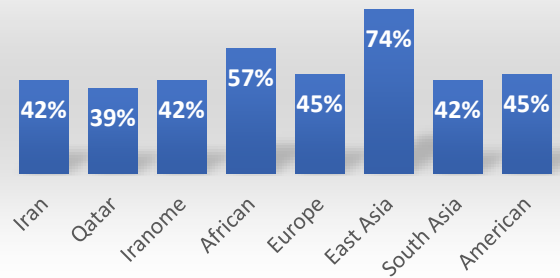

rs6629110 - **ACE2**

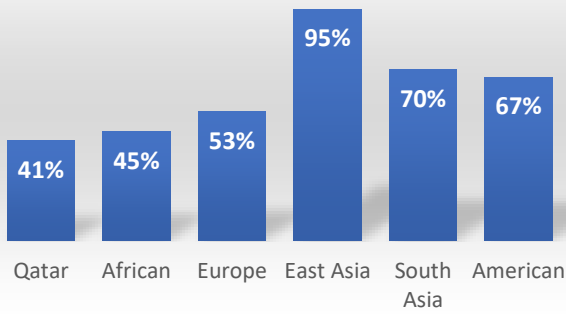

rs2158082 - **ACE2**

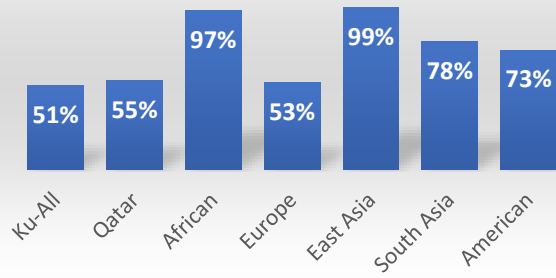

rs4830974 - **ACE2**

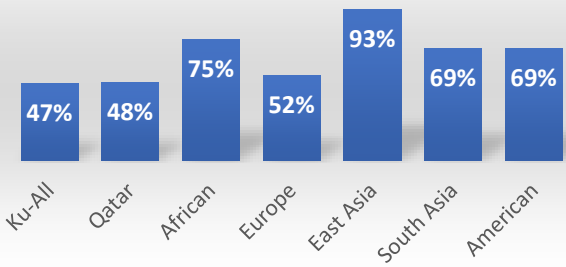

rs5936011 - **ACE2**

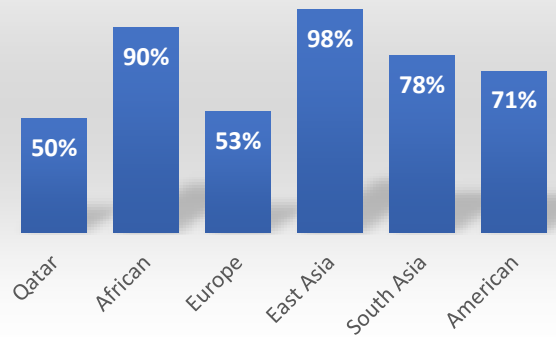

rs4060 - **ACE2**

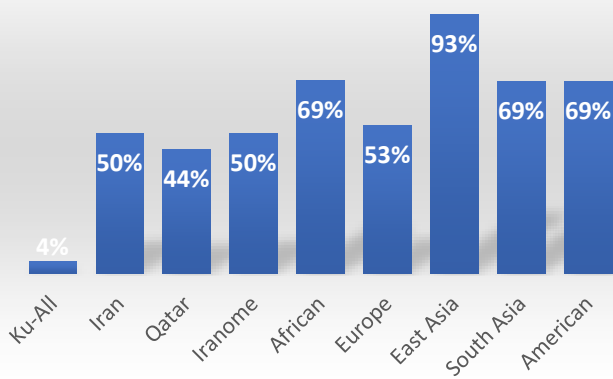

rs4830983 - **ACE2**

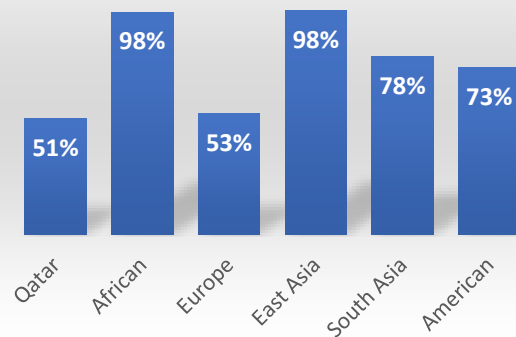

Supplement: mmc2.pdf [file mmc2.pdf]
