# Supplementary material
Source: PubMed Central journal article supplement (PMC8568830)
Supplement: mmc3.pdf [file mmc3.pdf]

| varid     | Gene             | Risk Allele | Trait        | Ref | Alt | Ku-CM   | Ku-Om   | Ku-Ex    | Iran    |
|-----------|------------------|-------------|--------------|-----|-----|---------|---------|----------|---------|
| rs1048455 | HLA-B            | ?/T         | Psoriasis    | C   | T   | 0.2084  | 0.2089  |          | 0.22727 |
| rs1065386 | HLA-B; AL671883  | C           | Proliferativ | G   | C   |         |         | 0.004184 | NA      |
| rs1140404 | AL671883         | G           | Blood prot   | T   | G   |         |         |          | NA      |
| rs1149852 | HLA-B            | C           | Crohn's dis  | T   | C   |         |         |          | NA      |
| rs1165761 | HLA-B            | C           | Blood prot   | A   | C   |         |         |          | NA      |
| rs1175330 | HLA-B            | ?           | Albumin-g    | C   | A   |         |         |          | 0.1039  |
| rs1219187 | HLA-B            | T/?         | Psoriatic a  | C   | T   | 0.2063  |         |          | 0.22727 |
| rs1219922 | HLA-B            | ?           | Psoriasis    | T   | A   |         |         |          | NA      |
| rs1319134 | HLA-B            | T           | Psoriatic a  | C   | T   | 0.2057  |         |          | NA      |
| rs1622406 | HLA-B            | T           | Blood prot   | C   | T   |         |         |          | 0.03896 |
| rs1634738 | HLA-B            | A           | Blood prot   | G   | A   |         |         |          | NA      |
| rs1719293 | HLA-B            | ?           | Ankylosing   | C   | G   |         |         |          | 0.01299 |
| rs2247056 | HLA-B; LINC02571 | T           | Low densit   | T   | C   | 0.92065 | 0.92687 |          | NA      |
| rs2523608 | HLA-B            | A           | Beta-2 mic   | G   | A   |         |         |          | 0.72078 |
| rs2523625 | HLA-B            | ?           | Body fat p   | A   | G   |         |         |          |         |
| rs2524081 | HLA-B            | C           | Hemoglob     | G   | C   |         |         |          | NA      |
| rs2524095 | HLA-B; LINC02571 | ?           | Hypertens    | A   | C   |         |         |          | NA      |
| rs2524139 | LINC02571        | C           | Blood prot   | G   | C   | 0.91972 |         |          | 0.90909 |
| rs2524142 | LINC02571        | G           | Blood prot   | C   | G   |         |         |          | NA      |
| rs2524143 | LINC02571        | C           | Blood prot   | T   | C   | 0.92297 |         |          | 0.9026  |
| rs2524163 | HLA-B            | T           | C-reactive   | C   | T   | 0.6385  | 0.6459  |          | NA      |
| rs2596492 | AL671883         | ?           | Blood prot   | A   | C   |         |         |          |         |
| rs2596492 | AL671883         | ?           | Blood prot   | A   | G   |         |         | 0.004184 | NA      |
| rs2836763 | LINC02571        | T           | Blood prot   | C   | T   |         |         |          | 0.40909 |
| rs2853928 | HLA-B            | A           | Blood prot   | A   | C   |         |         |          | 0.9026  |
| rs2853946 | HLA-B            | A           | Height       | A   | T   |         |         |          | NA      |
| rs3132479 | HLA-B            | A           | Weight       | A   | G   |         |         |          | NA      |
| rs3134792 | HLA-B            | ?/C         | Psoriasis/I  | T   | G   | 0.05854 |         |          | NA      |
| rs3442992 | HLA-B            | ?           | Height       | G   | A   |         |         |          | NA      |
| rs4155271 | AL671883         | A           | Blood prot   | G   | A   |         |         |          | NA      |
| rs4406273 | LINC02571        | A           | Psoriasis/P  | G   | A   | 0.1357  |         |          | NA      |
| rs5686304 | HLA-B            | T           | Blood prot   | G   | T   |         |         |          | NA      |
| rs6457374 | HLA-B            | T           | Height/Blo   | C   | T   | 0.92551 |         |          | 0.90909 |
| rs7750963 | HLA-B            | G           | Blood prot   | A   | G   |         |         |          | 0.9     |
| rs9264845 | HLA-B            | C           | Blood prot   | G   | C   |         |         |          | NA      |
| rs9264942 | HLA-B            | C/?         | Crohn's dis  | T   | C   | 0.4169  | 0.4146  |          | 0.46104 |
| rs9265503 | HLA-B            | T           | Blood prot   | C   | T   |         |         |          | NA      |
| rs9357121 | HLA-B            | T           | LDL choles   | T   | G   |         | 0.01895 |          | NA      |
| rs9366778 | LINC02571        | G           | Birth weig   | G   | A   | 0.5525  | 0.5694  |          | 0.6039  |

| Qatar   | GME     | Iranome  | African | Europe | East Asia | South Asia | American |
|---------|---------|----------|---------|--------|-----------|------------|----------|
| 0.27841 | NA      |          | 0.084   | 0.1431 | 0.0516    | 0.196      | 0.084    |
| 0.33995 | 0.11932 | 0.3969   | 0.3676  | 0.3936 | 0.5853    | 0.528      | 0.418    |
| 0.0375  | NA      |          | 0.1142  | 0.0408 | 0.0565    | 0.123      | 0.046    |
| 0.08523 | NA      |          | 0.0643  | 0.0616 | 0.1954    | 0.058      | 0.117    |
| 0.2619  | NA      |          | 0.0756  | 0.1392 | 0.1538    | 0.191      | 0.094    |
| 0.0625  | NA      |          | 0.031   | 0.0706 | 0.0833    | 0.087      | 0.088    |
| 0.27841 | NA      |          | 0.084   | 0.1431 | 0.0526    | 0.196      | 0.084    |
| 0.23295 | NA      |          | 0.0726  | 0.0974 | 0.0367    | 0.143      | 0.05     |
| 0.14773 | NA      |          | 0.0862  | 0.1421 | 0.0972    | 0.289      | 0.088    |
| 0.00581 | NA      |          | 0.031   | 0.0278 | 0.001     | 0          | 0.058    |
| 0.23418 | NA      |          | 0.3979  | 0.2942 | 0.1855    | 0.243      | 0.29     |
| 0.07955 | NA      |          | 0.0144  | 0.0636 | 0.0774    | 0.108      | 0.089    |
| 0.875   | NA      |          | 0.91    | 0.7952 | 0.8343    | 0.876      | 0.876    |
| 0.77841 | NA      |          | 0.7005  | 0.6292 | 0.3909    | 0.65       | 0.62     |
|         |         |          | 0.3336  | 0.3111 | 0.2867    | 0.447      | 0.248    |
| 0.01705 | NA      |          | 0.0893  | 0.1014 | 0.005     | 0.01       | 0.104    |
| 0.58523 | NA      |          | 0.7474  | 0.6412 | 0.7292    | 0.666      | 0.774    |
| 0.875   | NA      |          | 0.91    | 0.7942 | 0.8323    | 0.871      | 0.876    |
| 0.875   | NA      |          | 0.91    | 0.7942 | 0.8323    | 0.87       | 0.876    |
| 0.88636 | NA      |          | 0.941   | 0.7952 | 0.8323    | 0.87       | 0.878    |
| 0.59659 | NA      |          | 0.7784  | 0.6412 | 0.7113    | 0.658      | 0.775    |
|         |         | 0.078217 | 0.0166  | 0.0736 | 0.002     | 0.045      | 0.024    |
| 0.36364 | NA      | 0.256949 | 0.1241  | 0.169  | 0.1647    | 0.178      | 0.171    |
| 0.30682 | NA      |          | 0.5068  | 0.3469 | 0.3393    | 0.405      | 0.331    |
| 0.88636 | NA      |          | 0.9402  | 0.7952 | 0.8323    | 0.87       | 0.878    |
| 0.38636 | NA      |          | 0.5446  | 0.3509 | 0.2143    | 0.376      | 0.467    |
| 0.54545 | NA      |          | 0.6649  | 0.5129 | 0.5327    | 0.58       | 0.725    |
| 0.09091 | NA      |          | 0.0537  | 0.0865 | 0.0774    | 0.094      | 0.03     |
| 0.22727 | NA      |          | 0.4425  | 0.2058 | 0.1151    | 0.216      | 0.281    |
| 0.00568 | NA      | 0.03117  | 0.0144  | 0.0278 | 0.001     | 0          | 0.061    |
| 0.23295 | NA      |          | 0.0726  | 0.0984 | 0.0367    | 0.143      | 0.055    |
| 0.28409 | NA      |          |         |        |           |            |          |
| 0.88636 | NA      |          | 0.941   | 0.7962 | 0.8343    | 0.876      | 0.878    |
| 0.875   | NA      |          | 0.91    | 0.7952 | 0.8343    | 0.876      | 0.876    |
| 0.00568 | NA      |          | 0.0582  | 0.1133 | 0.1151    | 0.063      | 0.141    |
| 0.40909 | NA      |          | 0.27    | 0.3618 | 0.3929    | 0.525      | 0.304    |
| 0.09804 | NA      |          | 0.3343  | 0.2634 | 0.1528    | 0.215      | 0.19     |
| 0.02841 | NA      |          | 0.0076  | 0.0368 | 0.1905    | 0.04       | 0.099    |
| 0.53977 | NA      |          | 0.6051  | 0.4592 | 0.6111    | 0.594      | 0.586    |
