# Supplementary material
Source: PubMed Central journal article supplement (PMC8568830)
Supplement: mmc4.pdf [file mmc4.pdf]

15 ACE2 eQTL variants in Kuwait, Iran and Qatar.

| dbSNP                                                  | gene                         | GME | Kuwait Alle | Iranome | Qatar | AFR   |
|--------------------------------------------------------|------------------------------|-----|-------------|---------|-------|-------|
| <b>A. eQTL variants downregulating ACE2 expression</b> |                              |     |             |         |       |       |
| rs112171234                                            | ACE2 (exonic)/BMX (intronic) | NA  | NA          | NA      | 0.057 | 0.212 |
| rs75979613                                             | FANCB (exonic)               | NA  | NA          | NA      | 0.011 | 0     |
| <b>B. eQTL variants upregulating ACE2 expression</b>   |                              |     |             |         |       |       |
| rs12010448                                             | MOSPD2,ASB9 (intergenic)     | NA  | NA          | NA      | 0.03  | 0.126 |
| rs4646127                                              | ACE2 (intron)                | NA  | NA          | NA      | 0.579 | 0.824 |
| rs5936029                                              | CA5BP1-CA5B (intron)         | NA  | NA          | NA      | 0.488 | 0.901 |
| rs6632704                                              | CLTRN(intron)                | NA  | NA          | NA      | 0.409 | 0.519 |
| rs1996225                                              | CA5BP1-CA5B(intron)          | NA  | NA          | 0.4217  | 0.386 | 0.566 |
| rs6629110                                              | ?                            | NA  | NA          | NA      | 0.409 | 0.446 |
| rs2158082                                              | ?                            | NA  | 0.5133      | NA      | 0.545 | 0.973 |
| rs4830974                                              | CLTRN                        | NA  | 0.4723      | NA      | 0.477 | 0.745 |
| rs5936011                                              | CLTRN                        | NA  | NA          | NA      | 0.5   | 0.902 |
| rs4060                                                 | CA5BP1-CA5B                  | NA  | 0.0418      | 0.5019  | 0.443 | 0.692 |
| rs4830983                                              | CA5BP1-CA5B                  | NA  | NA          |         | 0.511 | 0.975 |

| EUR  | EAS  | SAS  | AMR  | ChinaMAP |
|------|------|------|------|----------|
| 0    | 0    | 0    | 0.03 | NA       |
| 0.01 | 0    | 0    | 0    | 0.00005  |
|      |      |      |      |          |
| 0    | 0    | 0    | 0.01 | NA       |
| 0.65 | 0.99 | 0.8  | 0.75 | 0.9967   |
| 0.52 | 0.98 | 0.79 | 0.71 | 0.987    |
| 0.53 | 0.93 | 0.69 | 0.67 | 0.9428   |
| 0.45 | 0.74 | 0.42 | 0.45 | 0.7512   |
| 0.53 | 0.95 | 0.7  | 0.67 | 0.955    |
| 0.53 | 0.99 | 0.78 | 0.73 | 0.9953   |
| 0.52 | 0.93 | 0.69 | 0.69 | 0.9927   |
| 0.53 | 0.98 | 0.78 | 0.71 | 0.987    |
| 0.53 | 0.93 | 0.69 | 0.69 | 0.939    |
| 0.53 | 0.98 | 0.78 | 0.73 | 0.987    |
